# Supplementary material
Source: PubMed Central journal article supplement (PMC10873122)
Supplement: NIHMS1929036-supplement-1.pdf [file NIHMS1929036-supplement-1.pdf]

# Supplemental Figure 1

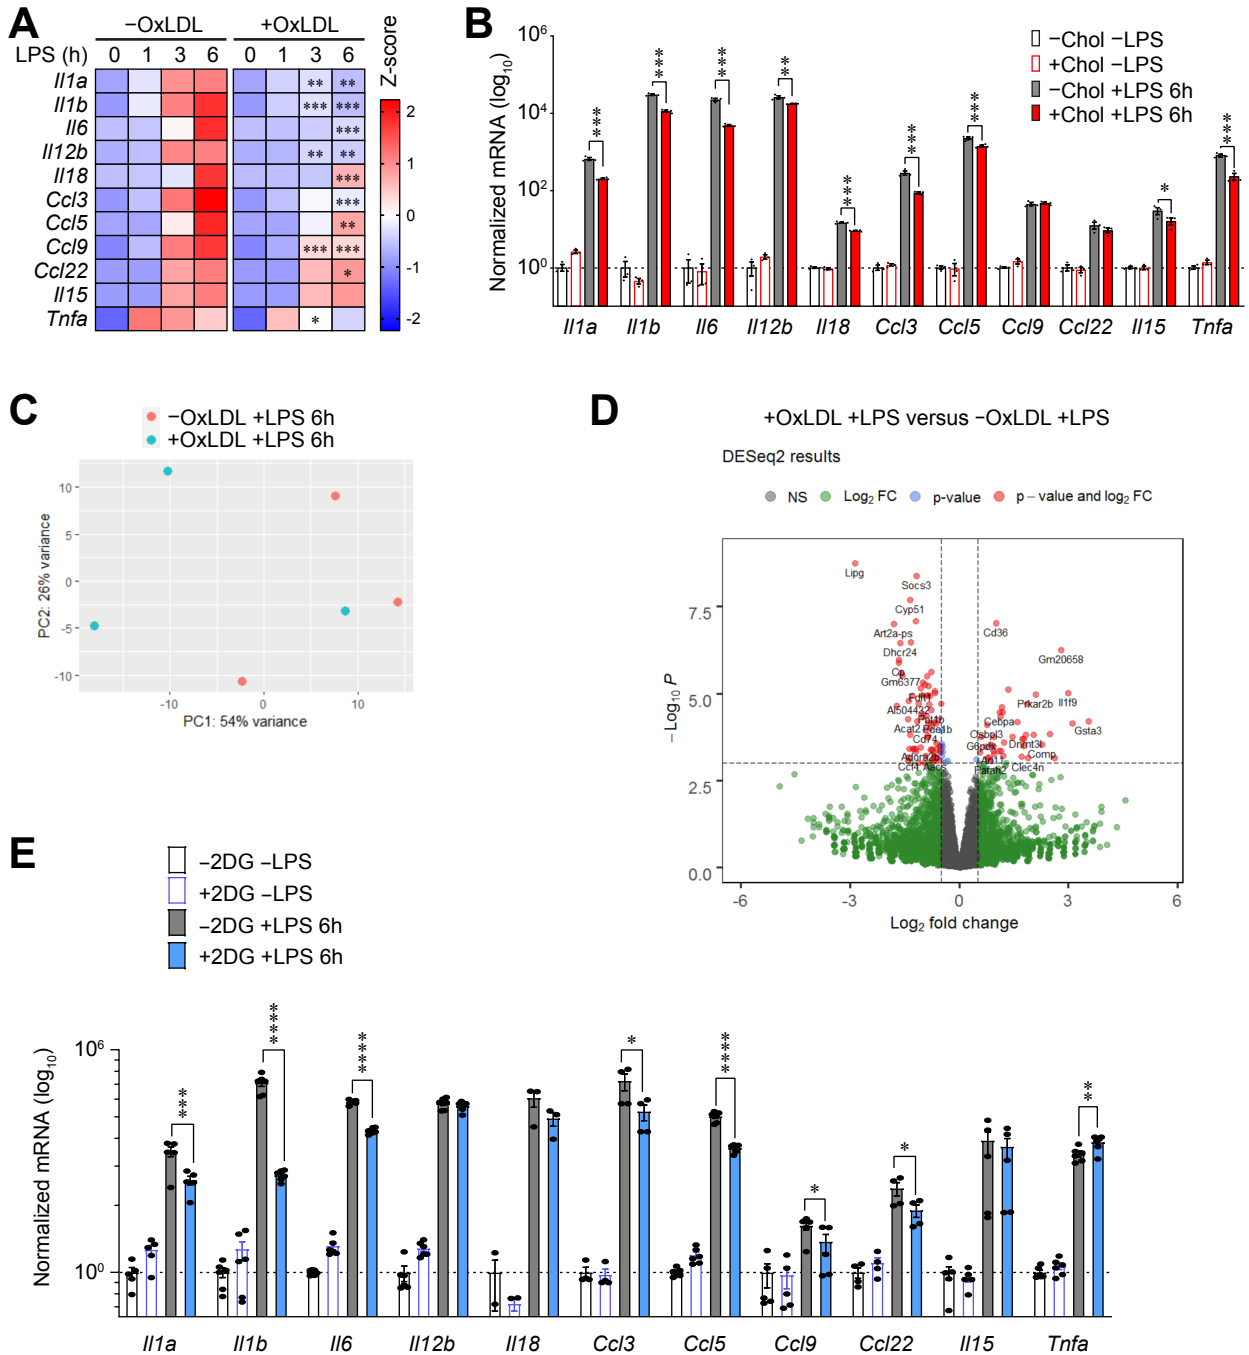

**(A and B)** Effect of lipid accumulation in PM $\phi$ s and LPS stimulation on inflammatory gene mRNA expression. mRNA was analyzed by qPCR. **(A)**  $\pm$ OxLDL accumulation (heat map z scores, n=3-4), **(B)**  $\pm$ cholesterol (Chol) accumulation. In the -Chol group, PM $\phi$ s were cultured for 24 h in media containing ethanol without cholesterol. For each gene, values were normalized to values without cholesterol and LPS (assigned a value of 100, dashed line, n=3). **(C and D)** Transcriptomic analysis of LPS-stimulated PM $\phi$ s with and without oxLDL accumulation. Both groups were assessed 6 h after stimulation with LPS. **(C)** Principal component analysis of sample variance (n = 3) and **(D)** volcano plot illustrating enrichment of genes in the two groups. Genes with adjusted p values of <0.1 and a log<sub>2</sub>FC of <-0.5 or >0.5 are highlighted. **(E)** Effect of 2-deoxyglucose (2DG) pretreatment (1 h) on inflammatory gene expression in PM $\phi$ s. Four groups were studied; with or without 2DG (+2DG or -2DG) and with or without 6 h LPS stimulation (+LPS 6 h or -LPS). mRNA was quantified by qPCR. For each gene, data were normalized to the -2DG -LPS group (assigned a value of 1, dashed line, n=3-6). The mean  $\pm$  SEM is plotted in all graphs. Statistical significance was determined by two-way ANOVA with Bonferroni correction (\*P<0.05, \*\*P<0.01, \*\*\*P<0.001, \*\*\*\*P<0.0001).

# Supplemental Figure 2

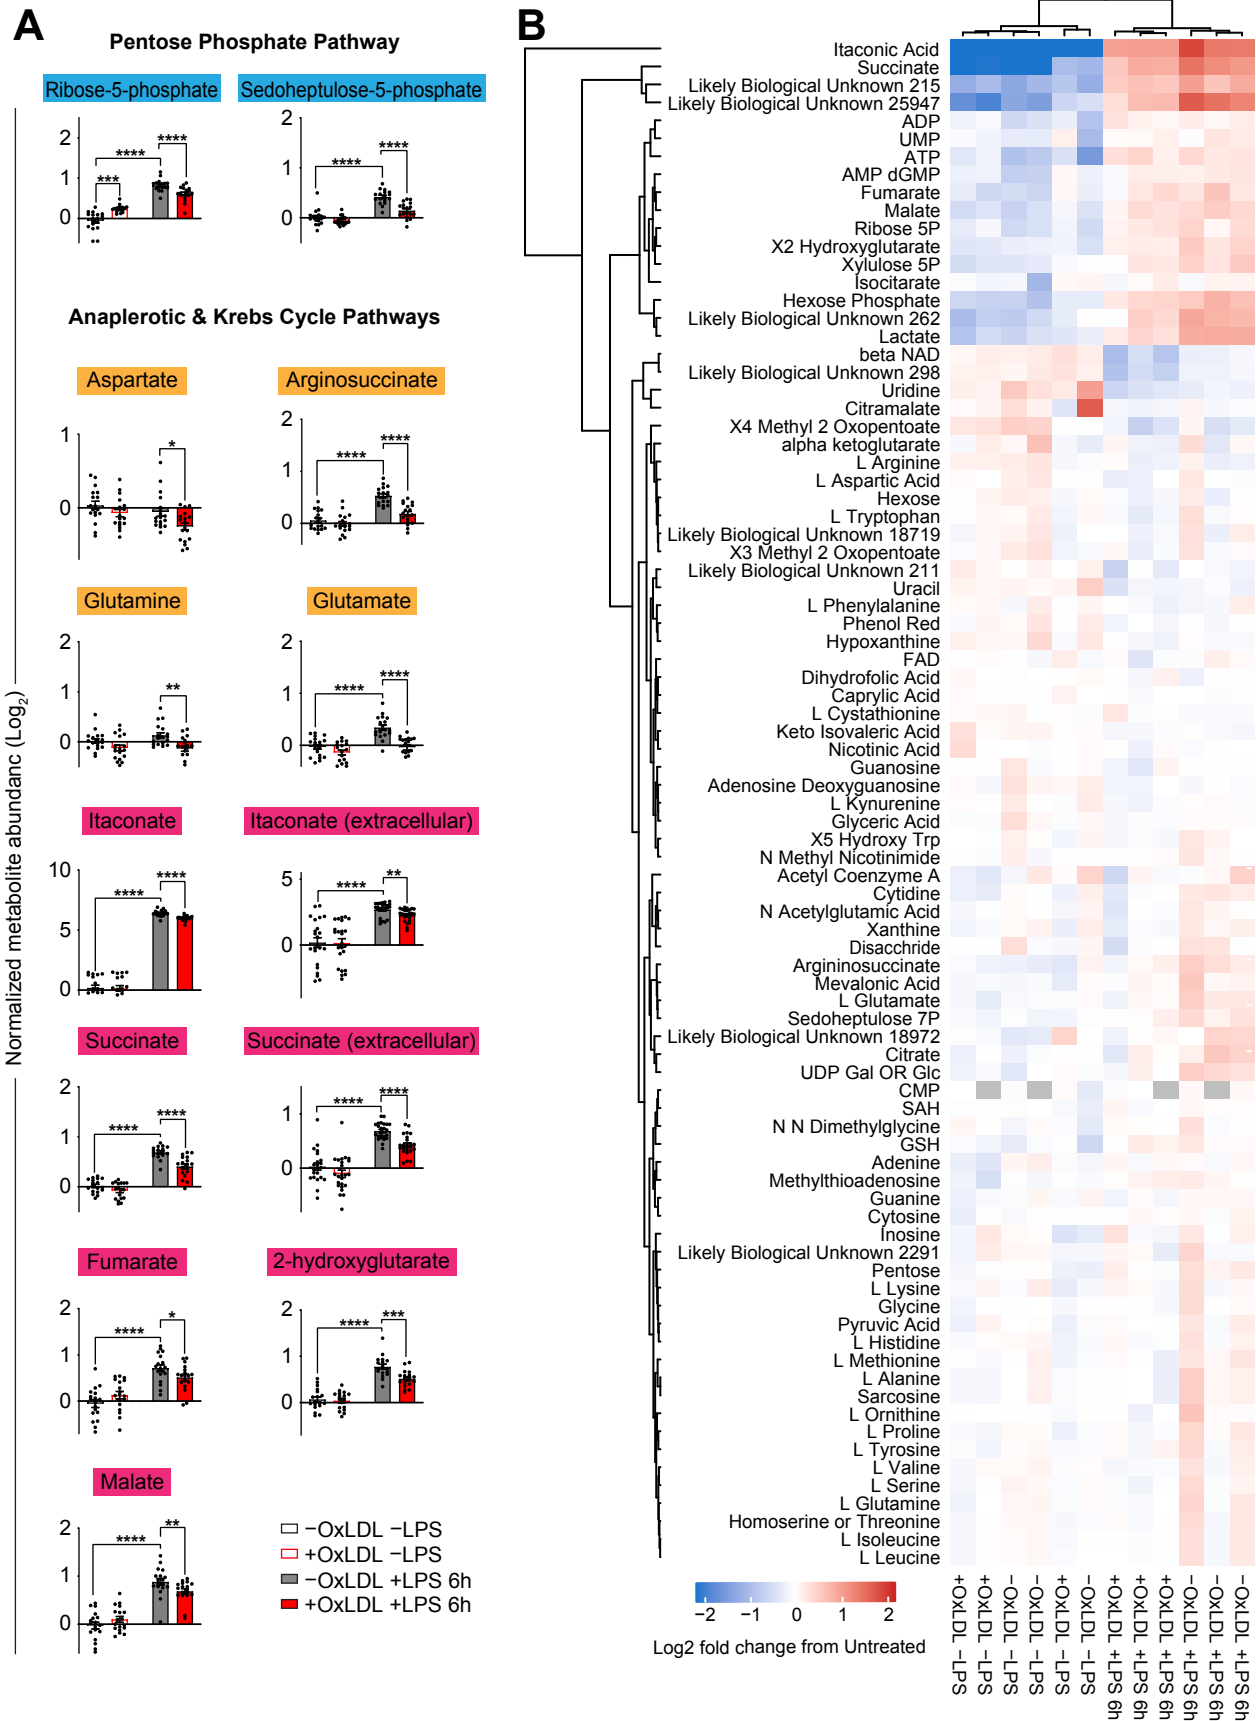

**(A and B)** Steady-state metabolomics from four groups of PMφs: ±oxLDL (24 h) and ±LPS stimulation (6 h). (A) Bar graphs showing metabolites with significant differences between groups. Values for each metabolite were normalized to the -oxLDL -LPS group (log<sub>2</sub> scale, n=18). Metabolites are organized by metabolic pathways: pentose phosphate pathway, Krebs cycle and anaplerotic (intermediary) reactions (glycolysis pathway metabolites are shown in Figure 2). The mean ± SEM is plotted. Statistical significance was determined by two-way ANOVA with Bonferroni correction (\*P<0.05, \*\*P<0.01, \*\*\*P<0.001, \*\*\*\*P<0.0001). (B) Complete metabolomics data expressed as a heat-map with unbiased clustering analysis (n=18).

# Supplemental Figure 3

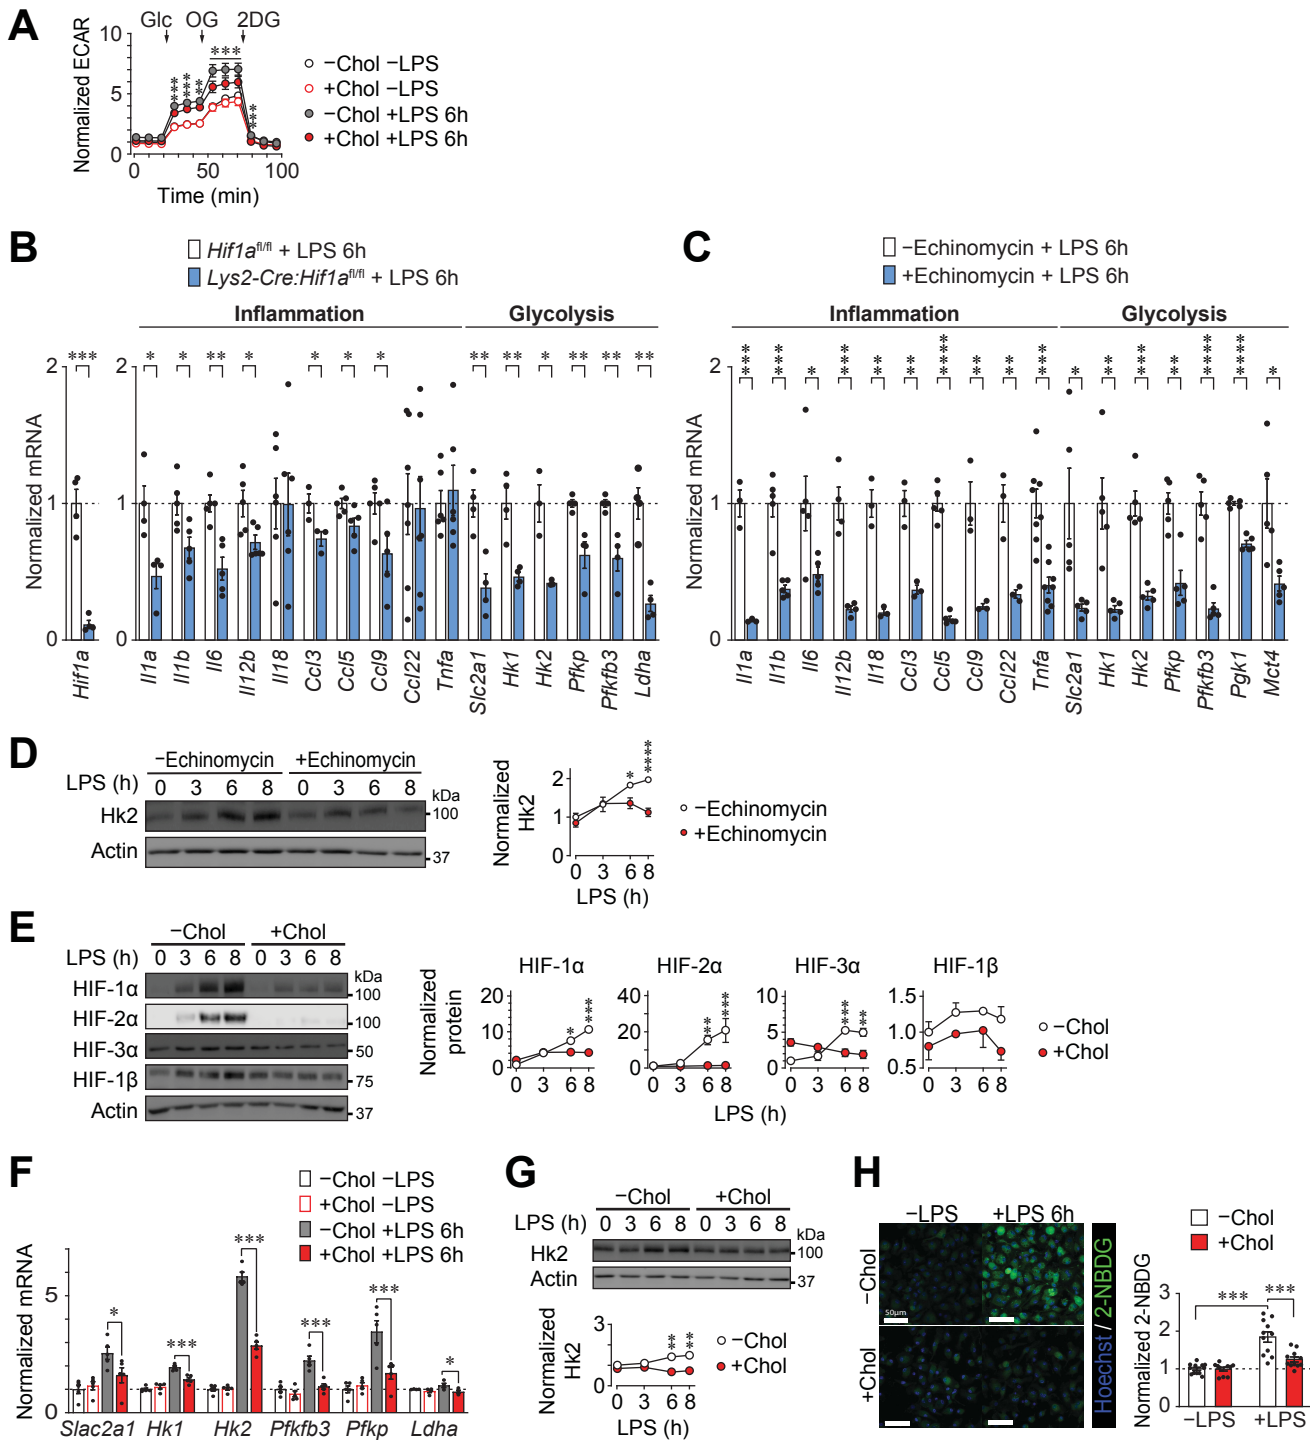

# Supplemental Figure 4

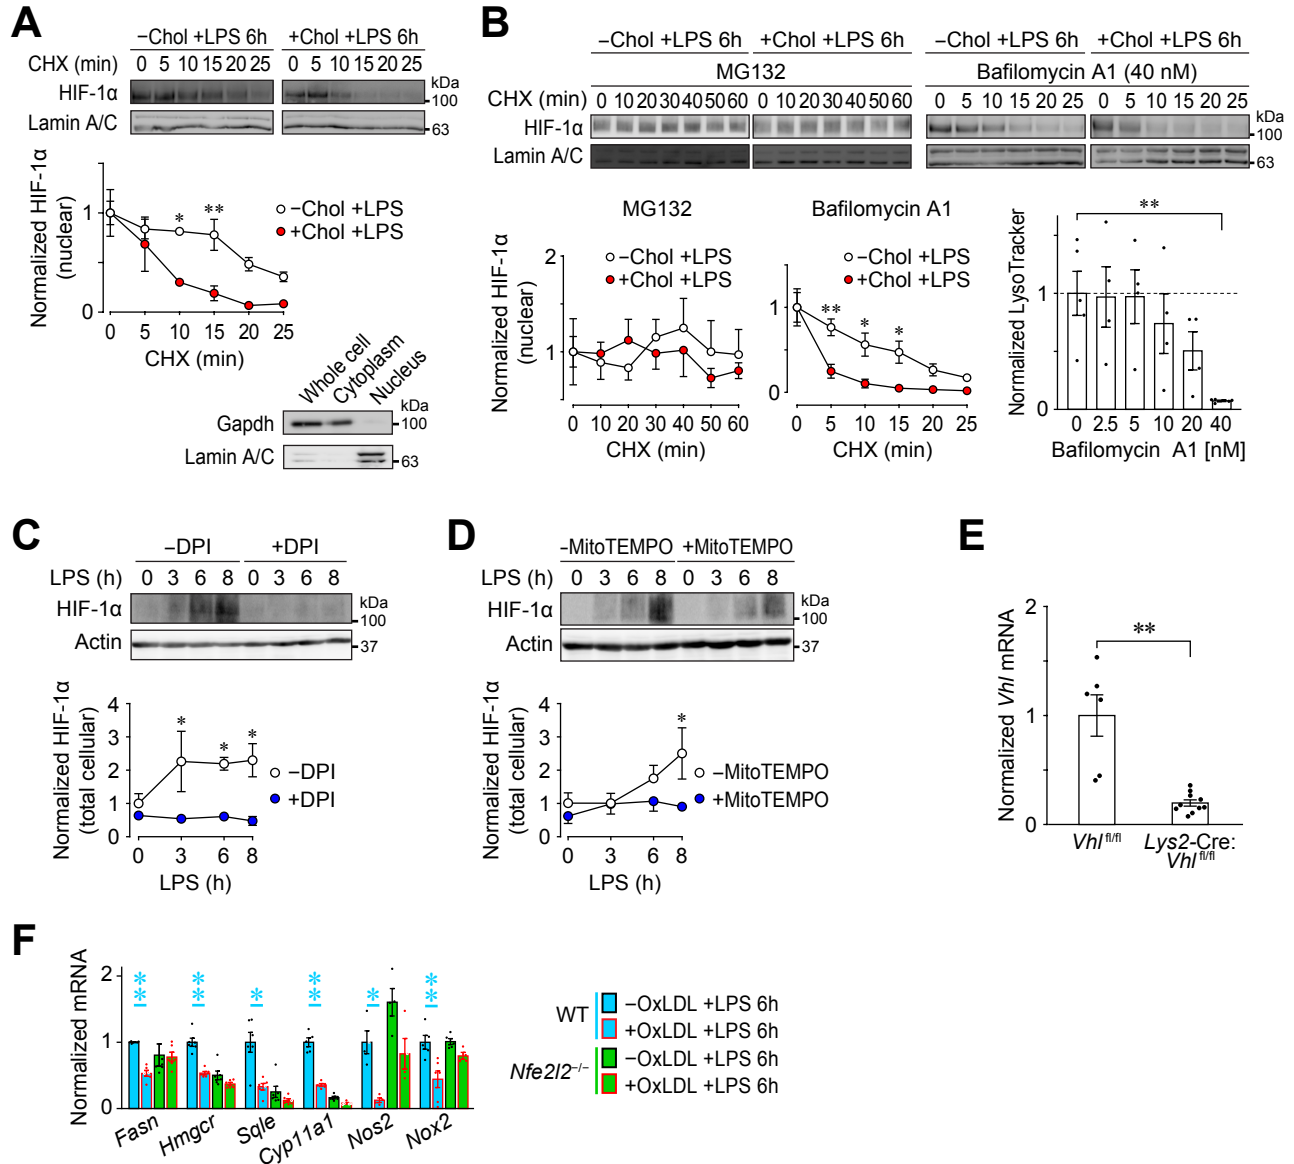

**(A)** Effect of cholesterol (Chol) accumulation on HIF-1 $\alpha$  stability in the nucleus of LPS-stimulated (6 h) PM $\phi$ s. Representative immunoblots of nuclear extracts show a time course after cycloheximide (CHX) treatment. Values normalized to the corresponding Lamin A/C and the respective pre-CHX (0 min) time point are plotted (the 0 min time point was assigned a value of 1, n=3-4). The immunoblot below shows Gapdh and Lamin A/C abundance in whole cell, cytoplasmic and nuclear subcellular fractionated lysates. **(B)** Proteasomes, not lysosomes, are the primary organelles for HIF-1 $\alpha$  degradation in cholesterol-loaded PM $\phi$ s. PM $\phi$ s were cultured in media with cholesterol or with ethanol (carrier) for 24 h, then stimulated with LPS (6 h). MG132 or Bafilomycin A1 (40 nM) were added 5 h after LPS stimulation to block protein degradation by the proteasome or lysosome, respectively. After 1 h (6 h post-LPS stimulation) cells were treated with CHX to block protein translation and nuclei were harvested at indicated intervals. Representative immunoblots and quantification are shown. Values normalized to the corresponding Lamin A/C and the respective pre-CHX (0 min) time point are plotted (the 0 min time point was assigned a value of 1, n=5). The graph on the far-right shows the normalized mean fluorescent intensity of lysotracker dye in LPS-stimulated PM $\phi$ s treated with increasing concentrations of Bafilomycin A1 (timing was as described above). Based on this experiment, the 40 nM concentration was selected for all experiments. **(C, D)** HIF-1 $\alpha$  protein levels are dependent on cytoplasmic and mitochondrial reactive oxygen species (ROS). Representative immunoblots and quantification of a LPS time course show the effect of blocking NADPH oxidases with diphenyleneiodonium (DPI) (C) or scavenging of mitochondria-derived ROS by mitoTEMPO (D) on LPS-induced HIF-1 $\alpha$  protein levels in PM $\phi$ s. DPI or mitoTEMPO were added 1 h prior to LPS treatment. Values are normalized to the corresponding actin and the pre-LPS (0 min) time point of the control (-inhibitor) group (the 0 min time point was assigned a value of 1, n=3 for DPI and n=4 for MitoTEMPO). **(E)** *Vhl* mRNA expression in *Vhl*<sup>fl/fl</sup> and *Lys2-Cre:Vhl*<sup>fl/fl</sup> BMDM $\phi$ s. qPCR analysis was performed and the data are normalized to mean values of the *Vhl*<sup>fl/fl</sup> group (assigned a value of 1, n=6-10, unpaired Student's t-test). **(F)** OxLDL accumulation suppresses mRNA expression of NADPH-requiring apoenzymes in LPS-stimulated (6 h) WT, but not *Nfe2l2*<sup>-/-</sup>, BMDM $\phi$ s. For each gene, qPCR data were normalized to WT cells without oxLDL (assigned a value of 1). Statistical comparisons using the Mann-Whitney U test were within each genotype (p values are blue for WT and green for *Nfe2l2*<sup>-/-</sup>, n=3-6). The mean  $\pm$  SEM is plotted in all graphs. Unless indicated otherwise statistical significance was determined by a two-way ANOVA with Bonferroni correction (\*P<0.05, \*\*P<0.01).
